# Supplementary material for: Neutrophil infiltration regulates clock-gene expression to organize daily hepatic metabolism
Source: eLife. 2020 Dec 8;9:e59258. doi: 10.7554/eLife.59258 (PMC7723411; doi:10.7554/eLife.59258)
Supplement: Figure 1—figure supplement 1—source data 1. [file elife-59258-fig1-figsupp1-data1.xlsx]

## Sheet: Hoja1
A			Left								Right
								Control
	2	1.96	2.16	2.92	2.68	1.72		2	591180	988585	222930	716945	831700	1007850	594595
	6	1.16	1.62	1.1	1.52	1.24		8	1486730	1810815	1634880	1318975	1418650	873885	1255540
	10	1.34	1.02	1.62	1.92	1.42		14	1758005	1787185	1792170	1558585	1303240
	14	0.36	0.48	0.28	0.26	0.18		20	1507410	1226340	1349595	1411765
	18	0.84	1.4	1.32	0.7	0.58		2	591180	988585	222930	716945	831700	1007850	594595
	22	0.78	1.8	2.74	0.94	0.84
	2	1.96	2.16	2.92	2.68	1.72
														Anova; Tukey
						Anova; Kruskal Wallis
				Ccl3											Cxcl2								Cxcl12								Cxcl1
C
	ZT2	1.56463	1.20488	0.957581	0.611822	1.24307	0.625054	0.79296			0.730456	1.48918	0.222764	1.30595	1.63386	0.788408	0.82938			2.18075	1.2434	1.09868	0.946239	0.22015	0.979186	0.331599		2.60343	1.33214	0.652995	0.336612	0.515898	0.558926
	ZT14	0.697461	2.82617	0.573618	0.904628	2.82978	0.539035	3.72144	1.35428	t test	1.83845	0.298292	0.461912	0.450651	1.06649	0.0614016	5.1318	0.266464	t test	0.134589	0.607761	1.59952	0.286543	0.504718	1.40172	0.282612	t test	0.571221	0.0739518	0.0698291	0.280066	0.104547	0.218331	t test
	2	0.544168	0.342935	0.154896	0.50685	0.10507
	8	0.147443	0.11839	0.186903	0.163654	0.110096
	14	0.0712053	0.0744987	0.107742	0.122432	0.0132964
	20	0.0658589	0.199645	0.118966	0.12046	0.295024
	2	0.544168	0.342935	0.154896	0.364981
						Anova; Kruskal Wallis
D
		Hepatocytes	Hepatocytes+Lymphocytes T			Hepatocytes	Hepatocytes+Lymphocytes B			Hepatocytes	Hepatocytes+BMDM		Hepatocytes	Hepatocytes + Col 0.5 mg/ml
		0.858478	1.42704			1.37574	1.47285			0.783819	0.691404		0.766366	0.872595
		0.954667	1.33123			1.24902	0.719089			1.03826	0.909172		0.936307	1.21925
		1.18318	1.02803			0.757185	0.869493			0.709749			0.813382	1.19545
		1.12842	1.19547			1.00984	0.777967			0.779364	0.66162		1.27535	1.09679
		0.766232	0.976361			0.765695				0.616317	0.539247		1.40056	0.978198
		1.10902	0.845684			0.842519				0.750845	0.759514		0.808027
										0.703599	0.66079
			t test				t test			0.802072	0.875519			t test
E
		Lyzs-Cre	MCL1 Lyzs-KO	Mrp8-Cre	MCL1 Mrp8-KO
		11088.9	8927.69	12276.6	9544.78
		8681.92	5763.66	11022	7609.86
		14790.1	6420.78	10927	10131.2
		11156.4	14157.7	6651.31	8462.8
		12497.1		6317.67
		6360.98
		Anova; t test
F
		Lyzs-Cre	MCL1 Lyzs-KO
		1.61	0.15
		1.42	0.27
		4.44	0.65
		1.9	0.39
		1.51	0.33
		1.01	0.77
		1.76	0.48
			Welch's t test
