# Supplementary material for: Neutrophil infiltration regulates clock-gene expression to organize daily hepatic metabolism
Source: eLife. 2020 Dec 8;9:e59258. doi: 10.7554/eLife.59258 (PMC7723411; doi:10.7554/eLife.59258)
Supplement: Figure 1—figure supplement 2—source data 1. [file elife-59258-fig1-figsupp2-data1.xlsx]

## Sheet: Hoja1
A		Blood			BM			Spleen
	Lyzs-Cre	MCL1 Lyzs-KO		Lyzs-Cre	MCL1 Lyzs-KO		Lyzs-Cre	MCL1 Lyzs-KO
	11.5	1.36		39.3	7.58		1.16	0.74
	24.1	2.34		38.6	10.4		1.67	0.65
	30	3.14		37.6	10.2		1.12	0.79
	16.4	3.55		37.3	6.6		1.73	0.65
	21.5	1.26		32.5	8.03		1.29	0.7
	11	5.09		34.2	10.7		1.11	0.64
	9.23	3.15			6.57			0.47
	13.2	4.01
								Welch's t test
		Welch's t test			t test
B		Monocytes			Neutrophils
	Lyzs-Cre	MCL1 Lyzs-KO		Lyzs-Cre	MCL1 Lyzs-KO
	0.04	0.04		0.56	0.18
	0.04	0.1		0.5	0.12
	0.06	0.08		0.86	0.2
	0.04	0.08		1.12	0.2
	0.06	0.04		2.94	0.34
	0.06	0.06		0.54	0.32
	0.08	0.06		1.18	0.2
		t test			Welch's t test
C
	Liver monocytes			Liver macrophages			Liver neutrophils
	Lyzs-Cre	MCL1 Lyzs-KO		Lyzs-Cre	MCL1 Lyzs-KO		Lyzs-Cre	MCL1 Lyzs-KO
	8867	3520		254450	173279		3849	273
	5708	7640		95798	251633		4800	718
	15627	12197		199948	148545		2281	1269
	34853	10834		267038	236500		4727	1649
	9600	12294		204060	181846		4209	780
	20229	4661		191301	252684		2213	868
	10688	8574		174154	163302		3370	848
		Welch's t test			t test			Welch's t test
	BM monocytes			BM macrophages			BM neutrophils
	Lyzs-Cre	MCL1 Lyzs-KO		Lyzs-Cre	MCL1 Lyzs-KO		Lyzs-Cre	MCL1 Lyzs-KO
	80873	174617		109583	291636		362687	67233
	85075	225376		116266	298423		124872	89438
	80659	122727		101920	367327		340964	86009
	67969	117418		115158	340942		322850	57281
	57933	147941		121638	331468		285730	70698
		127171			325877		311387	91426
								55931
		Welch's t test			Welch's t test			Welch's t test
D						Bmal1												Clock												Per2
		Lyzs-Cre					MCL1 Lyzs-KO							Lyzs-Cre					MCL1 Lyzs-KO							Lyzs-Cre					MCL1 Lyzs-KO
	2	0.982294	1.08647	0.861944	0.988706	1.08058	0.816469	0.910732	0.686295	0.76653	0.732989	t test	2	1.15322	1.08886	0.86982	0.98808	0.900017	0.974214	0.767406	0.66856	0.629241	0.617631	t test	2	1.01744	0.940525	1.25903	0.850468	0.932535	1.69642	1.98418	2.48818	1.86116	1.46074	t test
	8	0.0513805	0.0482454	0.0605218	0.079702	0.0557962	0.0229918	0.01608	0.0202477	0.0323774		t test	8	0.724787	0.5986	0.870589	0.53692	0.369325	0.190095	0.247562	0.277772	0.335616		t test	8	1.7398	3.88948	3.75792	4.95816	4.73826	3.99306	2.54263	3.14035	1.72804		t test
	14	0.0132754	0.0233902	0.0221178	0.0140769	0.0230299	0.377607	0.130732	0.0429643	0.153925	0.120426	Welch's t test	14	0.27462	0.292726	0.192184	0.21533	0.266882	0.309497	0.663363	0.47346	0.724646	0.660119	Welch's t test	14	4.65812	3.91568	3.98337	6.00419	4.91681	5.49636	10.1923	5.40639	11.4377	6.83312	Welch's t test
	20	0.485522	0.63568	0.522481	0.667242	0.606262	0.651174	0.409952	0.68854	0.50662	0.611784	t test	20	0.653014	0.589129	0.901177	0.730249	0.712754	0.811146	0.498308	0.721532	0.731129	0.833589	t test	20	3.09837	2.58363	2.99983	3.14094	6.41512	4.67044	5.54863	5.58417	8.59564	4.70619	t test
	2	0.982294	1.08647	0.861944	0.988706	1.08058	0.816469	0.910732	0.686295	0.76653	0.732989		2	1.15322	1.08886	0.86982	0.98808	0.900017	0.974214	0.767406	0.66856	0.629241	0.617631		2	1.01744	0.940525	1.25903	0.850468	0.932535	1.69642	1.98418	2.48818	1.86116	1.46074
E
	Left						Right
	ZT2 Lyzs-Cre	ZT13 Lyzs-Cre	ZT2 MCL1Lyzs-KO	ZT13 MCL1Lyzs-KO			ZT2 Lyzs-Cre	ZT13 Lyzs-Cre	ZT2 MCL1Lyzs-KO	ZT13 MCL1Lyzs-KO
	217825	1039611	6945.74	7000			2.25352	0.10768	1.18099	0.155006
	74816.1	467729	21060.6	16666.7			1.34087	0.116459	3.16959	0.175999
	457110	808113	6788.23	7553.76			1.30785	0.627327	1.91786	0.223789
	176219	428036	5866.67	10632.6			2.30827	0.0882477	0.948972	0.100066
							1.97169	0.316396
				t-test			1.57323	0.0995231
								0.179841
										t-test
