# Supplementary material for: Neutrophil infiltration regulates clock-gene expression to organize daily hepatic metabolism
Source: eLife. 2020 Dec 8;9:e59258. doi: 10.7554/eLife.59258 (PMC7723411; doi:10.7554/eLife.59258)
Supplement: Figure 1—source data 1. [file elife-59258-fig1-data1.xlsx]

## Sheet: Hoja1
A				Left									Right
	2	6845	4935	3186	2550	5385	5599			2	1.37341	0.923036	0.824675	1.11798	0.760902
	8	3815	2930	3775	1751	1303	2738			6	0.417154	0.406174	0.472287	0.488481	0.440629
	14	1665	1824	2953	3188	1005				10	0.572403	0.37948	0.54573	0.275231	0.253406
	20	957	5971	3766	1818	2529	2069			14	0.188571	0.27201	0.1804	0.109636	0.24206
	2	6845	4935	3186	2550	5385	5599			18	0.251951	0.265074	0.236071	0.121394	0.145762
										22	0.236488	0.4641	0.242609	0.255176	0.223813
		Anova; Tukey test								2	1.37341	0.923036	0.824675	1.11798	0.760902
											Anova; Kruskal-Wallis test; Dunn's test
C				Bmal1									Clock
	2	0.857412	1.52739	2.11718	1.01689	2.35792				2	0.203657	0.303026	0.354012	0.325828	0.423304
	6	0.0332819	0.200574	0.115771	0.022502	0.0734723				6	0.601518	0.640714	0.501405	0.528373	0.387137
	10									10
	14	0.0160352	0.0460644	0.01463	0.119009	0.0193858				14	0.117566	0.0816628	0.0894956	0.205032	0.0919774
	18	0.446048	0.33079	0.423289	0.142058	0.160541				18	0.381973	0.189866	0.284947	0.190297	0.244883
	22									22
	2	0.857412	1.52739	2.11718	1.01689	2.35792				2	0.203657	0.303026	0.354012	0.325828	0.423304
		Anova; Kruskal-Wallis test; Dunn's test									Anova; Tukey test
				Nr1d2									Per2
	2	0.0801514	0.113334	0.177723	0.218252	0.12909				2	0.0610525	0.122723	0.0605993	0.103828	0.0604887
	6	0.756341	0.666446	0.559117	0.758883	0.452997				6	0.0849835	0.0826006	0.0711284	0.142364	0.103241
	10									10
	14	1.22713	0.591178	0.579327	1.60142	0.927283				14	1.25857	1.16588	0.744474	2.20241	1.21822
	18	0.57535	0.217253	0.244641	0.373845	0.155257				18	1.32663	0.5818	0.676361	0.523401	0.972415
	22									22
	2	0.0801514	0.113334	0.177723	0.218252	0.12909				2	0.0610525	0.122723	0.0605993	0.103828	0.0604887
		Anova; Kruskal-Wallis test; Dunn's test									Anova; Kruskal-Wallis test; Dunns' test
				Cry2
	2	0.118424	0.502613	0.689887	0.246719	0.45176
	6	0.601698	0.486124	0.301941	0.601416	0.287205
	10
	14	1.03329	0.440842	0.426288	0.942303	0.559155
	18	0.587821	0.827823	0.869338	0.537221	0.519933
	22
	2	0.118424	0.502613	0.689887	0.246719	0.45176
		t test
D		2	14
		78.3753	25.3563
		72.7002	24.1761
		82.7982	29.7431
		76.3177	13.0204
		76.6808	32.594
		t test
E
		Bmal				Clock
		Hepatocytes	Hepatocytes with neutrophils			Hepatocytes	Hepatocytes with neutrophils
		1.07103	1.61147			0.913605	1.1471
		0.85222	1.31508			0.658322	1.09617
		0.886759	1.31693			1.07775	1.16948
		0.985128	1.9279			1.20616	2.3664
		1.07136	1.57714			1.19532	1.38146
		1.1335	2.33547			0.948847	2.23224
		0.941824	1.16894			0.590161	1.52725
		1.12358	1.2267			1.01357	1.25877
		0.934594	1.15806			0.620809	1.57054
		0.922593	1.10248			1.43486	0.93735
		1.05167	1.12232			1.16294	0.85399
		1.02574	1.04742			1.37708	1.61305
						0.864225	0.996204
		Welch's t test				0.905899	1.28327
						1.03046	1.36541
						1.09106	1.14667
						0.980663	1.39835
						0.928279
						Welch's t test
F
		Bmal				Clock
		Hepatocytes	Hepatocytes with elastase			Hepatocytes	Hepatocytes with elastase
		1.20732	1.71676			1.00221	1.86908
		0.793297	1.59132			0.801491	1.53348
		0.999387	1.15084			1.1963	1.62286
		0.774237	1.40493			0.937421	1.16234
		1.35702	1.91615			1.29041	1.18334
		0.868746	1.36779			0.772169	1.19346
		1.12624	2.78137			0.990677	1.69929
		0.951148	0.694813			0.85065	1.83886
		0.922607	2.2902			1.15867	1.49186
		0.996583	2.88569
		0.910672	5.42494			t test
		1.09275	4.35637
		Welch's t test
G
					Mrp8-Cre						MCL1Mrp8-KO
		Bmal1	1.53095	1.15328	0.437416	0.87835			0.15101	0.122483	0.854819	0.114543	0.645449		t test
		Clock	0.967851	1.16706	0.896678	0.952482	1.01593		0.601134	0.429929	0.762802	0.643279	1.03341		t test
		Nr1d2	0.7061	0.64084	1.32209	1.1547	1.17627		1.09101	1.43481	1.51794	1.41835			t test
		Per2	0.561483	0.663166	2.14474	0.699977	0.930631		3.49459	2.69014	3.72725	1.5818	0.87639		t test
		Cry2	0.75213	0.529396	1.34713	0.994161	1.37718		2.38349	3.14965	2.996	0.725935			t test
H
		Mrp8-Cre	MCL1Mrp8-KO
		71.1227	25.9737
		97.2834	15.1975
		80.6861	48.4269
		37.0963	55.5648
		95.5509	21.088
		t test
