# Supplementary material for: Neutrophil infiltration regulates clock-gene expression to organize daily hepatic metabolism
Source: eLife. 2020 Dec 8;9:e59258. doi: 10.7554/eLife.59258 (PMC7723411; doi:10.7554/eLife.59258)
Supplement: Figure 2—figure supplement 1—source data 1. [file elife-59258-fig2-figsupp1-data1.xlsx]

## Sheet: Hoja1
																									CN vs Neutrop JL	WT JL vs Neutrop JL	CN vs WT JL
B		Lyzs-Cre Normal Cycle								Lyzs-Cre JetLag								MCL1 Lyzs-KO JetLag
	2	0.698734	1.12743	0.972152	1.20169					0.816878	1.14093	1.03291	1.11392	1.20506				0.15865	0.334177	0.246414	0.239662				t test	t test	t test
	8	0.776371	0.901266	0.870886	0.965401					0.908017	0.776371	0.914768	1.627	0.951899				0.0742616	0.0776371	0.0877637	0.178903	0.0506329			t test	Welch's t test	Welch's t test
	14	0.162025	0.124895	0.0877637	0.131646	0.101266	0.0675106	0.151899		1.36709	0.982278	0.303797	0.691983	0.519831	0.813502	0.921519	1.33333	0.0742616	0.175527	0.141772	0.0708861	0.263291	0.141772	0.135021	t test	Welch's t test	Welch's t test
	20	0.442194	0.303797	0.00371308	0.364557	0.278565				0.374684	0.587342	0.718987	0.995781	0.816878				0.273418	0.222785	0.347679	0.0911392	0.0978903			t test	t test	t test
	2	0.698734	1.12743	0.972152	1.20169					0.816878	1.14093	1.03291	1.11392	1.20506				0.15865	0.334177	0.246414	0.239662
C	BM Mrp8-Cre	BM CXCR2 Mrp8-KO
	0.991949	0.548685
	0.988382	1.15854
	1.35144	0.898666
	1.16994	0.690086
	1.07485	0.758877
	1.33049	1.12977
	1.04487	0.902472
	0.906313	1.00842
	t test
D	BM Mrp8-Cre	BM CXCR2 Mrp8-KO
	16.3191	12.8058
	12.6826	13.888
	21.4389	10.6945
	19.2706	9.61228
	20.2359	16.1983
	16.8069	16.0157
		14.0279
		17.6876
	t test
E
		Lyzs-Cre JetLag								p38γ/δLyzs-KO JetLag
	2	5773	2179	5601	2473	4014	10136			1806	2975	1530	2148	1344	725		t test
	8	5839	2301	11587	2541	8102	7386	9710		2746	4786	3902	2827	2796	780		t test
	14	3687	6264	13364	12905	6712	5294	13953		1087	3772	4033	3906	1711		4383	t test
	20	8005	5533	3990	4207	12187	5710	8188		1530	1316	1093	1252	3514	2681		t test
	2	5773	2179	5601	2473	4014	10136			1806	2975	1530	2148	1344	725
F
	Lyzs-Cre JetLag	p38γ/δLyzs-KO JetLag
	2.17	1.17
	1.74	1.47
	1.8	1.11
	1.58	1.05
	1.95	1.4
	1.51	0.84
		0.93
	t test
G
	Lyzs-Cre JetLag	p38γ/δLyzs-KO JetLag
	5.7	3.37
	4.4	4.4
	7.7	1.88
	5.8	2.72
	3.1	2.26
	8.9	6.44
	5.5	2.58
	t test
