# Supplementary material for: Neutrophil infiltration regulates clock-gene expression to organize daily hepatic metabolism
Source: eLife. 2020 Dec 8;9:e59258. doi: 10.7554/eLife.59258 (PMC7723411; doi:10.7554/eLife.59258)
Supplement: Figure 2—figure supplement 2—source data 1. [file elife-59258-fig2-figsupp2-data1.xlsx]

## Sheet: Hoja1
	A
		Lyzs-Cre	Lyzs-Cre Ly6G Ab
		1.12	0.16
		1.24	0.16
		1.22	0.16
		1.56	0.1
		1.16	0.12
		1.12	0.1
			Welch's t test
	B
		Lyzs-Cre	Lyzs-Cre Ly6G Ab
		0.1	0.1
		0.08	0.12
		0.14	0.04
		0.06	0.02
		0.14	0.04
		0.12	0.12
			t test
	C		Bmal1			Clock
		Lyzs-Cre	Lyzs-Cre Ly6G Ab		Lyzs-Cre	Lyzs-Cre Ly6G Ab
		0.670985	0.298905		0.769513	0.942813
		0.515575	0.346194		0.791589	0.763573
		0.773964	0.786368		0.987163	0.623999
		0.59185	0.142755		0.842581	0.575259
		0.610501	0.563114		0.780622	0.72723
		0.670729	0.312515		0.780729	0.829436
		0.579542	0.437478		0.769714	0.568537
		0.576633	0.740931		1.19146	0.705114
		0.793963			1.36516	0.760372
			Welch's t test			t test
			Per2			Cry2
		Lyzs-Cre	Lyzs-Cre Ly6G Ab		Lyzs-Cre	Lyzs-Cre Ly6G Ab
		1.63006	1.48981		0.921841	1.29965
		2.27506	3.42629		0.970813	0.840897
		1.24373	2.68473		0.908234	1.00026
		1.96301	1.8968		0.896097	1.14703
		1.57923	5.16023		0.74796	1.33105
		1.69679	3.57382		0.878939	0.872012
		2.16408	4.0765		0.8	0.932392
		1.38624	1.89284
		2.22238	1.38769
			Welch's t test			Welch's t test
