# Supplementary material for: Neutrophil infiltration regulates clock-gene expression to organize daily hepatic metabolism
Source: eLife. 2020 Dec 8;9:e59258. doi: 10.7554/eLife.59258 (PMC7723411; doi:10.7554/eLife.59258)
Supplement: Figure 2—source data 1. [file elife-59258-fig2-data1.xlsx]

## Sheet: Hoja1
A		Left
		WT Normal Cycle								WT JetLag
	2	0.698734	1.12743	0.972152	1.20169					0.816878	1.14093	1.03291	1.11392	1.20506
	8	0.776371	0.901266	0.870886	0.965401					0.908017	0.776371	0.914768	1.627	0.951899
	14	0.162025	0.124895	0.0877637	0.131646	0.101266	0.0675106	0.151899		1.36709	0.982278	0.303797	0.691983	0.519831	0.813502	0.921519	1.33333		Welch's t test
	20	0.442194	0.303797	0.00371308	0.364557	0.278565				0.374684	0.587342	0.718987	0.995781	0.816878					t test
	2	0.698734	1.12743	0.972152	1.20169					0.816878	1.14093	1.03291	1.11392	1.20506
		Right
		WT Normal Cycle								WT JetLag
	2	1.9	1.8	1.06	1.32	1.24				1.82	1.74	2.18	1.8	1.26
	8	1.58	0.82	1.32	1.8	0.74				0.8	0.94	0.62	1.26	0.96
	14	0.88	0.8	0.96	0.4	0.7	0.92	0.88	0.62	1.82	1.52	1.6	1.06	0.88	1.5	1.28		t test
	20	0.58	0.78	0.58	0.66	0.9				1.04	1.14	0.82	1.06	0.9				t test
	2	1.9	1.8	1.06	1.32	1.24				1.82	1.74	2.18	1.8	1.26
B
		WT Normal cycle	WT JetLag
		12.7	25.5
		27.8	31.9
		23.6	56.3
		15.7	31.6
		21.5	54.5
			23
			26.6
			41.5
			21.8
			t test
C
		Lyzs-Cre JetLag										MCL1 Lyzs-KO JL										Lyzs-Cre NC
	2	25.3	16.6	15.4	24.2	24.1						21.2	26.5	33.2	25.2							48.9	71.3	54.5	57.4					t test
	8	22.7	26.4	14.3	19.6	29.1						43.3	13.2	23	13.5	22.4						25.3	48.8	81.8	38.1	27.1	54.5	71.7		Welch's t test
	14	25.5	31.9	56.3	31.6	54.5	23	26.6	41.5	21.8		5.7246	8.74162	2.96545	12.0165	3.53275	6.85921	8.94791	6.47241	8.45797	10.6498	12.7	27.8	23.6	15.7	21.5				Welch's t test
	20	49.1	82	66.3								35.9	32.6	45.3	26.9	31.1						47.9	34	46.4	15.7	44	20.6	16.3		t test
	2	25.3	16.6	15.4	24.2	24.1						21.2	26.5	33.2	25.2							48.9	71.3	54.5	57.4					t test
D
		Lyzs-Cre Normal Cycle								Lyzs-Cre Jet Lag								MCL1 Lyzs-KO Jet Lag
	2	1.35461	1.01379	1.00991	1.15533	1.19795				0.48116	0.0760516	0.182774	0.263972	0.10846				0.91829	1.28801	1.34684	1.18438				t test
	8	0.0780698	0.0466934	0.125979	0.103928	0.0786795				0.0336676	0.0327188	0.0199057	0.017412	0.0872183				0.268681	0.0407698	0.0740691	0.318576	0.0438308			t test
	14	0.381144	0.279074	0.468512	0.486842	0.460917	0.661976	0.429418	0.406919	2.19335	2.03674	2.04083	2.78404	2.16961	2.02736	2.07104	3.08002	1.66467	1.70111	1.49733	1.71442	1.60095	1.91762		Welch's t test
	20	1.18662	1.28405	0.878522	0.912943	1.06553				0.98802	0.958037	0.794092	0.854075	1.09643				1.78813	1.6748	1.65662	1.52306	1.44082			t test
	2	1.35461	1.01379	1.00991	1.15533	1.19795				0.48116	0.0760516	0.182774	0.263972	0.10846				0.91829	1.28801	1.34684	1.18438				t test
E
		ND										HFD										MCD
	2	1.37341	0.923036	0.824675	1.11798	0.760902	1.30591	1.44841	0.418878	1.19061	0.63619		0.647004	2.21838	2.26775	2.01326	1.02993	1.46168	1.563	1.18647	1.09653	1.10773		2.57818	2.04491	2.60447	4.38283
	6	0.417154	0.406174	0.472287	0.488481	0.440628							0.647033	0.874848	0.457905	0.398101	0.414921							1.38003	1.49364	1.11871	1.36667	1.3108
	10	0.572403	0.37948	0.54573	0.275232	0.253406							0.242497	0.54967	0.511775	0.361608	0.448203
	14	0.188571	0.27201	0.1804	0.109636	0.24206	0.498213	0.624259	0.181671	0.428174	0.341658		0.383515	0.279375	0.242306	1.16136	0.35931	0.224865	0.644925	1.13903	0.666992	0.91519		1.66638	0.649489	1.8425	1.0467
	18	0.251951	0.265074	0.236071	0.121394	0.145762							0.847605	1.14091	0.258407	0.267571	0.358632							0.214304	0.392959	0.581898	0.583678	0.480577
	22	0.236488	0.4641	0.242609	0.255175	0.223813							0.271815	0.251267	0.236316	0.341735	0.336377
	2	1.37341	0.923036	0.824675	1.11798	0.760902	1.30591	1.44841	0.418878	1.19061	0.63619		0.647004	2.21838	2.26775	2.01326	1.02993	1.46168	1.563	1.18647	1.09653	1.10773		2.57818	2.04491	2.60447	4.38283
		Two-way ANOVA with Fisher's post hoc test
G		Bmal1					Cry2					Per2
	Lyzs-Cre ND	Lyzs-Cre MCD	MCL1 Lyzs-KO MCD			Lyzs-Cre ND	Lyzs-Cre MCD	MCL1 Lyzs-KO MCD			Lyzs-Cre ND	Lyzs-Cre MCD	MCL1 Lyzs-KO MCD
	1.16833	0.439542	0.513443			1.82613	0.992106	1.45275			1.0251	0.508031	3.17032
	1.03181	1.79771	0.253796			1.58516	0.617333	2.28437			1.54555	0.917382	3.80917
	1.01468	4.06546	0.0512347			1.3205	0.764072	1.1004			1.63545	0.892007	1.27586
	0.923296	2.76464	0.305009			2.08969	0.737165	2.65753			2.84388	0.543292	1.74109
	1.10007	2.94042	1.29459			2.2768	0.846228	1.63737			1.83149	1.4863	1.47809
	0.894904	1.74188	1.81831			1.62613	1.14406	1.17077				1.56114	1.259
			t test					t test					t test
			Welch's t test					Welch's t test					Welch's t test
H
	Lyzs-Cre MCD	MCL1 Lyzs-KO MCD
	99.527	62.739
	65.182	40.592
	76.989	43.221
	66.108	34.177
	69.967	58.181
	50.069	43.787
	55.398
		t test
I
		Bmal1				Cry2			Per2
	Lyzs-Cre MCD	p38γ/δ Lyzs-KO MCD			Lyzs-Cre MCD	p38γ/δ Lyzs-KO MCD			Lyzs-Cre MCD	p38γ/δ Lyzs-KO MCD
	1.69637	0.654968			0.875708	1.44318			0.345569	0.964524
	1.69677	0.584172			0.922879	0.860265			0.504554	0.726128
	0.923918	0.784543			0.985311	1.05961			0.600299	0.69382
	1.83646	0.478133			0.927198	1.27103			0.447715	1.20588
	0.447872	0.420897			1.14629	2.8516			1.79461	1.24226
	0.385658	0.678485			1.26569	2.29058			2.18943	1.13291
	0.439318	0.383509			1.14139	3.64238			1.06633	0.535959
	0.315574	1.10819			0.97029	1.34664			1.23438	1.02853
	1.25806	0.30812			0.765235	2.34974			0.817113	2.48569
		0.484314				1.76484				2.11339
		0.367874				2.327				3.7207
		0.343214				2.51217				5.91055
		0.473876				2.06653				2.08762
		1.07776				2.39294				1.1885
		0.576158				1.66335				1.729
		0.223332				2.10963				2.74371
		0.417313				1.377				1.60657
		Welch's t test				Welch's t test				Welch's t test
