# Supplementary material for: Neutrophil infiltration regulates clock-gene expression to organize daily hepatic metabolism
Source: eLife. 2020 Dec 8;9:e59258. doi: 10.7554/eLife.59258 (PMC7723411; doi:10.7554/eLife.59258)
Supplement: Figure 3—figure supplement 1—source data 1. [file elife-59258-fig3-figsupp1-data1.xlsx]

## Sheet: Hoja1
A
	Lyzs-Cre MCD	MCL1 Lyzs-KO MCD
	0.822095	0.171706
	0.711932	0.259108
	0.939874	0.21624
	1.29128	0.907468
		t test
C
	pJNK/vinculin				ACC/vinculin
	Hepatocytes	Hepatocytes+neutrophils			Hepatocytes	Hepatocytes+neutrophils
	0.62146	0.784314			1.73028	2.66006
	0.451343	0.748585			0.801804	2.22271
	0.528829	1.0439			1.13857	2.26385
		t test				t test
D	Hepatocytes	Hepatocytes+NE
	0.446462	1.14492
	0.526441	0.917817
		t test
E
	Alb-Cre	Jnk1/2Alb-Cre
	0.83464	0.379573
	0.629698	0.2839
	0.66535	0.631148
	0.784172	0.613505
	1.06454	0.966228
	1.18526	0.3412
	0.962602	0.459041
	1.674	0.283995
	1.03863	0.466606
	1.16111	0.774843
		0.871335
		0.706158
		t test
F
			Bmal1						Clock						Acaca
	Control	Control + JNKi	Neutropenic	Neutropenic + JNKi			Control	Control + JNKi	Neutropenic	Neutropenic + JNKi			Control	Control + JNKi	Neutropenic	Neutropenic + JNKi
	0.585723	0.560689	0.556338	0.507275			0.485317	0.255945	0.1612	0.368145			0.355537	0.162823	0.553958	0.33934
	0.61882	0.48187	0.469499	0.30592			0.600834	0.248388	0.153155	0.154128			0.480332	0.223825	0.127289	0.232772
	0.811147	0.593757	0.694023	0.710763			0.77345	0.44394	0.26122	0.326405			0.292951	0.275042	0.196375	0.13928
	0.759063	0.529374	0.480383	0.281128			0.579376	0.356192	0.426653	0.235812			0.428718	0.162301	0.265938	0.153182
	1.04126	0.338153	0.556962	0.220337			0.693809	0.259285	0.263039	0.225889			0.42192	0.123202	0.113489	0.159694
	1.0339	0.338667	0.766864	0.250485			1.16065	0.275907	0.370589	0.306133			0.706465	0.175242	0.202233	0.162518
	0.621865	0.424497		0.598366			0.517963	0.334438		0.27158			0.302024	0.248463		0.141388
				Anova; Tukey test					Anova; Kruskal-Wallis test						Anova; Tukey test
				t test
H
	Hepatocytes	Hepatocytes+neutrophils
	1.14904	0.82458
	1.23626	0.842006
	0.983702	0.53741
	0.701538	0.697358
	0.987502	0.497314
	0.94196	0.730499
	1.01896	0.280189
	0.272995	0.598547
	1.76195	0.516683
	0.610581	0.612167
	1.43633	0.738565
	1.007	0.81061
	0.678965	0.616865
	0.905104	0.432764
	1.46984	0.396458
	0.634567	0.913112
	2.47127	0.539616
	1.95269	0.46544
	0.546838	0.317748
	0.268225	0.27998
	0.999514	0.403131
	0.770357	0.422394
	0.960295
	0.396246
	0.925797
	1.0201
	1.0541
		Welch's t test
I
	Lyzs-Cre MCD	MCL1 Lyzs-KO MCD
	0.75	1.98
	1.21	3.37
	1.17	2.79
		t test
J
	Lyzs-Cre MCD	p38γ/δ Lyzs-KO MCD
	0.0676672	1.47212
	0.0647063	1.5008
	0.137051	1.36385
		t test
K
	Lwt	L34	L34+shFGF21 clon 1	L34+shFGF21 clon 2
	0.781493	1.74534	0.333791	1.17408
	0.835169	1.06266	0.436258	0.905084
	1.16483	1.34846	0.299378	1.17387
		1.48484	0.540726	0.659293
			0.537974
	Anova; Bonferroni's Multiple Comparison Test
	t test
