# Supplementary material for: Neutrophil infiltration regulates clock-gene expression to organize daily hepatic metabolism
Source: eLife. 2020 Dec 8;9:e59258. doi: 10.7554/eLife.59258 (PMC7723411; doi:10.7554/eLife.59258)
Supplement: Figure 3—source data 1. [file elife-59258-fig3-data1.xlsx]

## Sheet: Hoja1
	A	Lyzs-Cre MCD	MCL1 Lyzs-KO MCD
		0.194153	0.0989359
		0.150868	0.0438331
		0.155868	0.117861
		t test
	B	Lyzs-Cre MCD	p38γ/δ Lyzs-KO MCD
		1.24293	0.910912
		1.1302	1.53219
		1.25657	1.26377
		1.24649	0.866012
		1.04276	0.52452
		1.15961	0.403277
			0.89132
			0.554588
		t test
		Welch's t test
	D	Hepatocytes	Hepatocytes+NE
		0.985723	1.42099
		1.00641	1.35942
		1.00786	1.09027
		1.07172	0.973485
		0.96429	1.11144
		0.883094	1.43537
		1.03177	1.22424
		1.01015	1.17256
		1.03898	1.1134
		1.00073	1.02292
		0.918455	1.01647
		1.01745	1.01177
		0.964832	1.05394
			1.01548
		t test
		Welch's t test
	E	Bmal1			Clock			Per2
		Alb-Cre MCD	Jnk1/2Alb-KOMCD		Alb-Cre MCD	Jnk1/2Alb-KOMCD		Alb-Cre MCD	Jnk1/2Alb-KOMCD
		1.24509	0.250097		0.86334	0.714338		1.02696	0.305516
		0.67571	0.206045		0.879467	0.620672		1.35141	0.201533
		0.830112	0.336398		0.910862	0.528437		1.15259	0.401516
		0.78207	0.354802		1.00503	0.874449		1.85146	0.227559
		0.885124	0.28324		1.02075	0.665644		1.22854	0.411955
		1.59906	0.281366		1.05057	0.576112		0.516167	0.516953
		0.625907	0.281629		1.01827	0.65288		0.891657	0.341853
		1.41149	0.237947		1.1491	0.512826		0.739775	0.596103
		0.621279	0.211667		0.802139	0.900403		0.731977	0.212227
		1.32416	0.423512		1.30047	0.830464			0.22695
			0.34819						0.250089
			0.211493
		t test			t test			t test
		Welch's t test						Welch's t test
		Cry2			Nrd1d2			Fgf21
		Alb-Cre MCD	Jnk1/2Alb-KOMCD		Alb-Cre MCD	Jnk1/2Alb-KOMCD		Alb-Cre MCD	Jnk1/2Alb-KOMCD
		0.827742	0.346892		0.885633	0.50686		0.862236	1.07607
		0.906681	0.196468		1.01822	0.443254		0.85044	4.55591
		1.1136	0.512896		1.05484	0.771771		0.91999	3.31747
		1.10539	0.691955		1.25963	0.75331		1.33999	1.39519
		1.04604	0.447995		1.02176	0.57462		1.03083	2.67886
		0.986104	0.462055		0.813101	0.493652		0.864705	2.45621
		0.762219	0.39214		0.993336	0.625288		1.51677	3.60163
		1.66452	0.379309		1.30471	0.4736		0.147559	0.396769
		0.725966	0.341652		0.857209	0.47489		1.06461	1.24827
		0.861746	0.317859		0.79156	0.632419		1.40287	1.1677
			0.362513			0.528344
			0.39243
		t test			t test			t test
		Welch's t test						Welch's t test
	I
		Lyzs-Cre MCD	Lyzs-Cre shFGF21 clon 1 MCD	p38γ/δ Lyzs-KO MCD	p38γ/δ Lyzs-KO ShFGF21 clon 1
		104.218	150.394	6.63228	106.116
		105.289	192.765	56.3744	96.168
		64.5867	179.313	23.213	82.9035
		154.709	116.232	33.1614	99.4842
		84.3859	106.311	39.7937	53.0582
		100.14	107.822	36.4775	152.542
		116.256	97.0859	56.3744	152.542
		51.3292	96.5746	23.213	126.013
		78.4254		13.2645	159.175
		64.1104		23.213	139.278
		116.019
		91.68
		144.685
		115.21
		78.9366
		131.576
		ANOVA; Bonferroni test
		t test
