# Supplementary material for: Neutrophil infiltration regulates clock-gene expression to organize daily hepatic metabolism
Source: eLife. 2020 Dec 8;9:e59258. doi: 10.7554/eLife.59258 (PMC7723411; doi:10.7554/eLife.59258)
Supplement: Figure 4—source data 1. [file elife-59258-fig4-data1.xlsx]

## Sheet: Hoja1
	A
		ZT2	ZT14
		136.586	45.1876
		175.548	70.2351
		148.907	21.0137
		64.9876	53.9251
		131.507	47.5904
			t test
	B
	Bmal1			Per2			Cry2
	WT ND	NE-KO ND		WT ND	NE-KO ND		WT ND	NE-KO ND
	2.27488	1.50243		0.617403	0.628987		1.2302	1.96935
	2.08297	1.08757		0.577057	1.23362		1.42047	1.81459
	1.97225	1.87284		0.58389	1.37298		1.37512	1.90972
	1.78936	1.38999		0.688405	0.578751		1.41756	2.31527
	2.02628	1.46345		0.499748	0.970826		1.15668	1.57139
	1.99262			0.520747			1.4108
	t test			t test			t test
				Welch's test
	C
	WT ND	NE-KO ND
	0.895939	0.896347
	0.961776	0.90902
	0.917429	0.891612
	0.914327	0.893531
	0.824673	0.898857
	0.957041	0.891816
	0.927367	0.800735
	0.99749	0.828449
	0.89102
	0.920279
	t test
	D
	WT MCD	NE-KO MCD
	141.361	124.338
	112.676	81.5234
	135.693	96.6236
	156.446	55.3693
	110.307	122.983
	144.47	110.953
	107.517	96.8781
	144.312	111.088
	130.04	85.5541
	131.973	96.1979
	t test
	F
	WT MCD	NE-KO MCD
	1.12703	0.29206
	0.87297	0.29594
	0.68156	0.13953
	1.36686	0.11818
	0.95159	0.20047
		0.20047
	t test
	Welch's test
	G
	WT MCD	NE-KO MCD
	1.22303	0.779468
	2.28745	0.46721
	1.5806	0.771629
	1.5806	0.024481
		t test
	H
	Bmal1					Cry2					Per2					Nrd1d2
	CX ZT2	elaneKO ZT2	CX ZT14	elaneKO ZT14		CX ZT2	elaneKO ZT2	CX ZT14	elaneKO ZT14		CX ZT2	elaneKO ZT2	CX ZT14	elaneKO ZT14		CX ZT2	elaneKO ZT2	CX ZT14	elaneKO ZT14
	1.14765	0.818356	0.471696	0.56941		0.967005	2.30358	0.673813	0.699405		1.45341	4.04052	4.40114	4.50055		0.794222	1.93241	0.572924	0.446027
	1.00856	0.938862	0.448476	0.489053		1.18152	1.82589	0.709482	0.786108		0.687473	4.68824	3.36932	4.5985		0.924759	1.76846	0.629912	0.57573
	0.893081	0.588451	0.4357	0.17646		1.24713	1.776	0.727485	0.990923		0.885607	3.22792	6.15499	4.09861		1.02968	1.98081	0.516394	0.811171
	0.958184	0.776431	0.58768	0.385088		1.10302	1.1955	0.769886	0.629817		0.769118	2.53429	6.57045	4.23965		0.821291	1.46901	0.481191	0.500669
	1.20801	0.560916	0.436095	0.592495		1.26493	1.45612	0.815751	0.715996		1.08197	4.72359	8.73909	3.74217		1.22916	1.36121	0.524471	0.591659
	1.17258	0.412078	0.696981	0.278979		0.761784	1.57709	0.891612	0.897544		0.724857	4.59275	5.755	3.57523		1.10053	1.57444	0.729325	1.03829
	0.67798	0.908149	0.830709	0.201248		0.788299	2.19039	1.08089	0.548094		1.38085	3.09169	7.79531	3.35002		1.07504	1.83839	0.65118	0.634775
	0.93396		0.855055			0.686307		1.10773			1.01672		4.84422			1.02532		0.755247
	ANOVA; Tukey					ANOVA; Tukey					ANOVA; Dunn's					ANOVA; Tukey
	t test										t test
											Welch's test
