# Supplementary material for: Neutrophil infiltration regulates clock-gene expression to organize daily hepatic metabolism
Source: eLife. 2020 Dec 8;9:e59258. doi: 10.7554/eLife.59258 (PMC7723411; doi:10.7554/eLife.59258)
Supplement: Figure 5—source data 1. [file elife-59258-fig5-data1.xlsx]

## Sheet: Hoja1
	B
		MCL1 Lyzs-KO JetLag	MCL1 Lyzs-KO+WT neutrophils JetLag	MCL1 Lyzs-KO+NE-ko neutrophils JetLag
		1.10285	1.36	0.826067
		1.04087	1.11	0.846471
		0.726391	1.1	0.909234
		0.661321	1.03	0.547082
		0.799938	1.07	0.798729
		0.938412	1.23	0.984963
			1.28	0.988937
		ANOVA; Tukey's
	C	MCL1 Lyzs-KO JetLag	MCL1 Lyzs-KO+WT neutrophils JetLag	MCL1 Lyzs-KO+NE-ko neutrophils JetLag
		6.95603	7.55293	4.88112
		6.5143	9.31569	8.05618
		7.25793	9.84219	8.36013
		7.04482	6.27737	6.60899
		7.44994	10.981	4.57275
		7.17513	10.3875	7.86851
		7.39744
		t test
		Welch's test
	E
		Upper (BMAL1-ELANE)			Lower (CJUN-ELANE)
		NE (X axis)	BMAL1 (Y axis)		NE (X axis)	C-JUN (Y axis)
		0.316	1.023		1.068	0.956539
		1.068	1.113		0.476	0.376009
		0.476	0.254		0.41	1.38541
		0.41	0.71		1.285	0.545963
		1.285	0.562		0.632	0.301583
		0.632	0.465		1.692	0.700789
		1.692	0.4		0.406	0.872597
		0.406	1.792		0.309	0.612754
		0.309	2.893		2.913	1.18384
		2.913	2.548		1.067	0.718318
		1.067	1.175		0.754	0.365248
		0.754	1.007		1.199	0.659364
		1.199	1.004		1.559	0.943939
		1.559	2.863		4.831	2.96047
		4.831	4.212		0.941	0.438961
		0.941	0.496		0.188	0.998469
		0.188	0.752		0.36	1.18372
		0.36	1.65		1.757	0.876247
		1.757	0.633
		Pearson'r correlation test			Pearson'r correlation test
